# Supplementary material for: High efficacy of alectinib in a patient with advanced lung adenocarcinoma with 2 rare ALK fusion sites: a case report
Source: PubMed Central journal article supplement — Transl Lung Cancer Res. 2022 Jan;11(1):100–10. doi: 10.21037/tlcr-21-1039 (PMC8825656; doi:10.21037/tlcr-21-1039), 2022-01
Supplement: tlcr-11-01-100-coif.pdf [file tlcr-11-01-100-coif.pdf]

## ICMJE DISCLOSURE FORM

Date: 20.12.2021

Your Name: Yan Li

Manuscript Title: High efficacy of alectinib in a patient with advanced lung adenocarcinoma with 2 rare ALK fusion sites: a case report

Manuscript number (if known): \_\_\_\_\_ TLCR-21-1039 \_\_\_\_\_

In the interest of transparency, we ask you to disclose all relationships/activities/interests listed below that are related to the content of your manuscript. "Related" means any relation with for-profit or not-for-profit third parties whose interests may be affected by the content of the manuscript. Disclosure represents a commitment to transparency and does not necessarily indicate a bias. If you are in doubt about whether to list a relationship/activity/interest, it is preferable that you do so.

The following questions apply to the author's relationships/activities/interests as they relate to the current manuscript only.

The author's relationships/activities/interests should be defined broadly. For example, if your manuscript pertains to the epidemiology of hypertension, you should declare all relationships with manufacturers of antihypertensive medication, even if that medication is not mentioned in the manuscript.

In item #1 below, report all support for the work reported in this manuscript without time limit. For all other items, the time frame for disclosure is the past 36 months.

|                                                           |                                                                                                                                                                                | Name all entities with whom you have this relationship or indicate none (add rows as needed)     | Specifications/Comments (e.g., if payments were made to you or to your institution) |
|-----------------------------------------------------------|--------------------------------------------------------------------------------------------------------------------------------------------------------------------------------|--------------------------------------------------------------------------------------------------|-------------------------------------------------------------------------------------|
| <b>Time frame: Since the initial planning of the work</b> |                                                                                                                                                                                |                                                                                                  |                                                                                     |
| 1                                                         | All support for the present manuscript (e.g., funding, provision of study materials, medical writing, article processing charges, etc.)<br><b>No time limit for this item.</b> | Shandong Key Research and Development Program (No. 2019GSF108251)                                |                                                                                     |
|                                                           |                                                                                                                                                                                | Technology support from Xiaoxing Su and Yan Lei of Berry Oncology Corporation for Bioinformatics |                                                                                     |
| <b>Time frame: past 36 months</b>                         |                                                                                                                                                                                |                                                                                                  |                                                                                     |
| 2                                                         | Grants or contracts from any entity (if not indicated in item #1 above).                                                                                                       | <u>_x_</u> None                                                                                  |                                                                                     |
|                                                           |                                                                                                                                                                                |                                                                                                  |                                                                                     |
| 3                                                         | Royalties or licenses                                                                                                                                                          | <u>_x_</u> None                                                                                  |                                                                                     |
|                                                           |                                                                                                                                                                                |                                                                                                  |                                                                                     |
| 4                                                         | Consulting fees                                                                                                                                                                | <u>_x_</u> None                                                                                  |                                                                                     |

|    |                                                                                                              |                                          |  |
|----|--------------------------------------------------------------------------------------------------------------|------------------------------------------|--|
|    |                                                                                                              |                                          |  |
| 5  | Payment or honoraria for lectures, presentations, speakers bureaus, manuscript writing or educational events | <input checked="" type="checkbox"/> None |  |
| 6  | Payment for expert testimony                                                                                 | <input checked="" type="checkbox"/> None |  |
| 7  | Support for attending meetings and/or travel                                                                 | <input checked="" type="checkbox"/> None |  |
| 8  | Patents planned, issued or pending                                                                           | <input checked="" type="checkbox"/> None |  |
| 9  | Participation on a Data Safety Monitoring Board or Advisory Board                                            | <input checked="" type="checkbox"/> None |  |
| 10 | Leadership or fiduciary role in other board, society, committee or advocacy group, paid or unpaid            | <input checked="" type="checkbox"/> None |  |
| 11 | Stock or stock options                                                                                       | <input checked="" type="checkbox"/> None |  |
| 12 | Receipt of equipment, materials, drugs, medical writing, gifts or other services                             | <input checked="" type="checkbox"/> None |  |
| 13 | Other financial or non-financial interests                                                                   | <input checked="" type="checkbox"/> None |  |

**Please summarize the above conflict of interest in the following box:**

Yan Li reports funding from the Shandong Key Research and Development Program (No. 2019GSF108251). We have received technology support from Xiaoxing Su and Yan Lei of Berry Oncology Corporation for Bioinformatics.

**Please place an "X" next to the following statement to indicate your agreement:**

**X I certify that I have answered every question and have not altered the wording of any of the questions on this form.**

## ICMJE DISCLOSURE FORM

Date: 20.12.2021

Your Name: Peng Duan

Manuscript Title: High efficacy of alectinib in a patient with advanced lung adenocarcinoma with 2 rare ALK fusion sites: a case report

Manuscript number (if known):\_TLCR-21-1039\_\_\_\_\_

In the interest of transparency, we ask you to disclose all relationships/activities/interests listed below that are related to the content of your manuscript. "Related" means any relation with for-profit or not-for-profit third parties whose interests may be affected by the content of the manuscript. Disclosure represents a commitment to transparency and does not necessarily indicate a bias. If you are in doubt about whether to list a relationship/activity/interest, it is preferable that you do so.

The following questions apply to the author's relationships/activities/interests as they relate to the current manuscript only.

The author's relationships/activities/interests should be defined broadly. For example, if your manuscript pertains to the epidemiology of hypertension, you should declare all relationships with manufacturers of antihypertensive medication, even if that medication is not mentioned in the manuscript.

In item #1 below, report all support for the work reported in this manuscript without time limit. For all other items, the time frame for disclosure is the past 36 months.

|                                                           |                                                                                                                                                                                | Name all entities with whom you have this relationship or indicate none (add rows as needed)      | Specifications/Comments (e.g., if payments were made to you or to your institution) |
|-----------------------------------------------------------|--------------------------------------------------------------------------------------------------------------------------------------------------------------------------------|---------------------------------------------------------------------------------------------------|-------------------------------------------------------------------------------------|
| <b>Time frame: Since the initial planning of the work</b> |                                                                                                                                                                                |                                                                                                   |                                                                                     |
| 1                                                         | All support for the present manuscript (e.g., funding, provision of study materials, medical writing, article processing charges, etc.)<br><b>No time limit for this item.</b> | Technology support from Xiaoxing Su and Yan Lei of Berry Oncology Corporation for Bioinformatics. |                                                                                     |
|                                                           |                                                                                                                                                                                |                                                                                                   |                                                                                     |
|                                                           |                                                                                                                                                                                |                                                                                                   |                                                                                     |
|                                                           |                                                                                                                                                                                |                                                                                                   |                                                                                     |
|                                                           |                                                                                                                                                                                |                                                                                                   |                                                                                     |
|                                                           |                                                                                                                                                                                |                                                                                                   |                                                                                     |
| <b>Time frame: past 36 months</b>                         |                                                                                                                                                                                |                                                                                                   |                                                                                     |
| 2                                                         | Grants or contracts from any entity (if not indicated in item #1 above).                                                                                                       | <input type="checkbox"/> _x_ None                                                                 |                                                                                     |
|                                                           |                                                                                                                                                                                |                                                                                                   |                                                                                     |
| 3                                                         | Royalties or licenses                                                                                                                                                          | <input type="checkbox"/> _x_ None                                                                 |                                                                                     |

|    |                                                                                                              |                                          |  |
|----|--------------------------------------------------------------------------------------------------------------|------------------------------------------|--|
|    |                                                                                                              |                                          |  |
| 4  | Consulting fees                                                                                              | <input checked="" type="checkbox"/> None |  |
| 5  | Payment or honoraria for lectures, presentations, speakers bureaus, manuscript writing or educational events | <input checked="" type="checkbox"/> None |  |
| 6  | Payment for expert testimony                                                                                 | <input checked="" type="checkbox"/> None |  |
| 7  | Support for attending meetings and/or travel                                                                 | <input checked="" type="checkbox"/> None |  |
| 8  | Patents planned, issued or pending                                                                           | <input checked="" type="checkbox"/> None |  |
| 9  | Participation on a Data Safety Monitoring Board or Advisory Board                                            | <input checked="" type="checkbox"/> None |  |
| 10 | Leadership or fiduciary role in other board, society, committee or advocacy group, paid or unpaid            | <input checked="" type="checkbox"/> None |  |
| 11 | Stock or stock options                                                                                       | <input checked="" type="checkbox"/> None |  |
| 12 | Receipt of equipment, materials, drugs, medical writing, gifts or other services                             | <input checked="" type="checkbox"/> None |  |
| 13 | Other financial or non-financial interests                                                                   | <input checked="" type="checkbox"/> None |  |

**Please summarize the above conflict of interest in the following box:**

The author received technology support from Xiaoxing Su and Yan Lei of Berry Oncology Corporation for Bioinformatics.

**Please place an "X" next to the following statement to indicate your agreement:**

**I certify that I have answered every question and have not altered the wording of any of the questions on this form.**

## ICMJE DISCLOSURE FORM

Date: 20.12.2021

Your Name: Yan Guan

Manuscript Title: High efficacy of alectinib in a patient with advanced lung adenocarcinoma with 2 rare ALK fusion sites: a case report

Manuscript number (if known):     TLCR-21-1039    

In the interest of transparency, we ask you to disclose all relationships/activities/interests listed below that are related to the content of your manuscript. "Related" means any relation with for-profit or not-for-profit third parties whose interests may be affected by the content of the manuscript. Disclosure represents a commitment to transparency and does not necessarily indicate a bias. If you are in doubt about whether to list a relationship/activity/interest, it is preferable that you do so.

The following questions apply to the author's relationships/activities/interests as they relate to the current manuscript only.

The author's relationships/activities/interests should be defined broadly. For example, if your manuscript pertains to the epidemiology of hypertension, you should declare all relationships with manufacturers of antihypertensive medication, even if that medication is not mentioned in the manuscript.

In item #1 below, report all support for the work reported in this manuscript without time limit. For all other items, the time frame for disclosure is the past 36 months.

|                                                           |                                                                                                                                                                         | Name all entities with whom you have this relationship or indicate none (add rows as needed)      | Specifications/Comments (e.g., if payments were made to you or to your institution) |
|-----------------------------------------------------------|-------------------------------------------------------------------------------------------------------------------------------------------------------------------------|---------------------------------------------------------------------------------------------------|-------------------------------------------------------------------------------------|
| <b>Time frame: Since the initial planning of the work</b> |                                                                                                                                                                         |                                                                                                   |                                                                                     |
| 1                                                         | All support for the present manuscript (e.g., funding, provision of study materials, medical writing, article processing charges, etc.)<br>No time limit for this item. | Technology support from Xiaoxing Su and Yan Lei of Berry Oncology Corporation for Bioinformatics. |                                                                                     |
| <b>Time frame: past 36 months</b>                         |                                                                                                                                                                         |                                                                                                   |                                                                                     |
| 2                                                         | Grants or contracts from any entity (if not indicated in item #1 above).                                                                                                | <u>_x_ None</u>                                                                                   |                                                                                     |
| 3                                                         | Royalties or licenses                                                                                                                                                   | <u>_x_ None</u>                                                                                   |                                                                                     |
| 4                                                         | Consulting fees                                                                                                                                                         | <u>_x_ None</u>                                                                                   |                                                                                     |

|    |                                                                                                              |                               |  |
|----|--------------------------------------------------------------------------------------------------------------|-------------------------------|--|
| 5  | Payment or honoraria for lectures, presentations, speakers bureaus, manuscript writing or educational events | <input type="checkbox"/> None |  |
|    |                                                                                                              |                               |  |
|    |                                                                                                              |                               |  |
| 6  | Payment for expert testimony                                                                                 | <input type="checkbox"/> None |  |
|    |                                                                                                              |                               |  |
|    |                                                                                                              |                               |  |
| 7  | Support for attending meetings and/or travel                                                                 | <input type="checkbox"/> None |  |
|    |                                                                                                              |                               |  |
|    |                                                                                                              |                               |  |
| 8  | Patents planned, issued or pending                                                                           | <input type="checkbox"/> None |  |
|    |                                                                                                              |                               |  |
|    |                                                                                                              |                               |  |
| 9  | Participation on a Data Safety Monitoring Board or Advisory Board                                            | <input type="checkbox"/> None |  |
|    |                                                                                                              |                               |  |
|    |                                                                                                              |                               |  |
| 10 | Leadership or fiduciary role in other board, society, committee or advocacy group, paid or unpaid            | <input type="checkbox"/> None |  |
|    |                                                                                                              |                               |  |
|    |                                                                                                              |                               |  |
| 11 | Stock or stock options                                                                                       | <input type="checkbox"/> None |  |
|    |                                                                                                              |                               |  |
|    |                                                                                                              |                               |  |
| 12 | Receipt of equipment, materials, drugs, medical writing, gifts or other services                             | <input type="checkbox"/> None |  |
|    |                                                                                                              |                               |  |
|    |                                                                                                              |                               |  |
| 13 | Other financial or non-financial interests                                                                   | <input type="checkbox"/> None |  |
|    |                                                                                                              |                               |  |
|    |                                                                                                              |                               |  |

**Please summarize the above conflict of interest in the following box:**

The author received technology support from Xiaoxing Su and Yan Lei of Berry Oncology Corporation for Bioinformatics.

**Please place an “X” next to the following statement to indicate your agreement:**

I certify that I have answered every question and have not altered the wording of any of the questions on this form.

## ICMJE DISCLOSURE FORM

Date: 20.12.2021

Your Name: Qing Chen

Manuscript Title: High efficacy of alectinib in a patient with advanced lung adenocarcinoma with 2 rare ALK fusion sites: a case report

Manuscript number (if known): \_\_TLCR-21-1039\_\_\_\_\_

In the interest of transparency, we ask you to disclose all relationships/activities/interests listed below that are related to the content of your manuscript. "Related" means any relation with for-profit or not-for-profit third parties whose interests may be affected by the content of the manuscript. Disclosure represents a commitment to transparency and does not necessarily indicate a bias. If you are in doubt about whether to list a relationship/activity/interest, it is preferable that you do so.

The following questions apply to the author's relationships/activities/interests as they relate to the current manuscript only.

The author's relationships/activities/interests should be defined broadly. For example, if your manuscript pertains to the epidemiology of hypertension, you should declare all relationships with manufacturers of antihypertensive medication, even if that medication is not mentioned in the manuscript.

In item #1 below, report all support for the work reported in this manuscript without time limit. For all other items, the time frame for disclosure is the past 36 months.

|                                                           |                                                                                                                                                                                | Name all entities with whom you have this relationship or indicate none (add rows as needed)      | Specifications/Comments (e.g., if payments were made to you or to your institution) |
|-----------------------------------------------------------|--------------------------------------------------------------------------------------------------------------------------------------------------------------------------------|---------------------------------------------------------------------------------------------------|-------------------------------------------------------------------------------------|
| <b>Time frame: Since the initial planning of the work</b> |                                                                                                                                                                                |                                                                                                   |                                                                                     |
| 1                                                         | All support for the present manuscript (e.g., funding, provision of study materials, medical writing, article processing charges, etc.)<br><b>No time limit for this item.</b> | Technology support from Xiaoxing Su and Yan Lei of Berry Oncology Corporation for Bioinformatics. |                                                                                     |
|                                                           |                                                                                                                                                                                |                                                                                                   |                                                                                     |
|                                                           |                                                                                                                                                                                |                                                                                                   |                                                                                     |
| <b>Time frame: past 36 months</b>                         |                                                                                                                                                                                |                                                                                                   |                                                                                     |
| 2                                                         | Grants or contracts from any entity (if not indicated in item #1 above).                                                                                                       | <u>_x_ None</u>                                                                                   |                                                                                     |
|                                                           |                                                                                                                                                                                |                                                                                                   |                                                                                     |
| 3                                                         | Royalties or licenses                                                                                                                                                          | <u>_x_ None</u>                                                                                   |                                                                                     |
|                                                           |                                                                                                                                                                                |                                                                                                   |                                                                                     |
| 4                                                         | Consulting fees                                                                                                                                                                | <u>_x_ None</u>                                                                                   |                                                                                     |
|                                                           |                                                                                                                                                                                |                                                                                                   |                                                                                     |

|    |                                                                                                              |                               |  |
|----|--------------------------------------------------------------------------------------------------------------|-------------------------------|--|
|    |                                                                                                              |                               |  |
| 5  | Payment or honoraria for lectures, presentations, speakers bureaus, manuscript writing or educational events | <input type="checkbox"/> None |  |
| 6  | Payment for expert testimony                                                                                 | <input type="checkbox"/> None |  |
| 7  | Support for attending meetings and/or travel                                                                 | <input type="checkbox"/> None |  |
| 8  | Patents planned, issued or pending                                                                           | <input type="checkbox"/> None |  |
| 9  | Participation on a Data Safety Monitoring Board or Advisory Board                                            | <input type="checkbox"/> None |  |
| 10 | Leadership or fiduciary role in other board, society, committee or advocacy group, paid or unpaid            | <input type="checkbox"/> None |  |
| 11 | Stock or stock options                                                                                       | <input type="checkbox"/> None |  |
| 12 | Receipt of equipment, materials, drugs, medical writing, gifts or other services                             | <input type="checkbox"/> None |  |
| 13 | Other financial or non-financial interests                                                                   | <input type="checkbox"/> None |  |

**Please summarize the above conflict of interest in the following box:**

The author received technology support from Xiaoxing Su and Yan Lei of Berry Oncology Corporation for Bioinformatics.

**Please place an "X" next to the following statement to indicate your agreement:**

**I certify that I have answered every question and have not altered the wording of any of the questions on this form.**



## ICMJE DISCLOSURE FORM

Date 13.12.2021

Your Name: Anna Grenda

Manuscript Title: High efficacy of alectinib in a patient with advanced lung adenocarcinoma with 2 rare ALK fusion sites: a case report

Manuscript number (if known) TLCR-21-1039

In the interest of transparency, we ask you to disclose all relationships/activities/interests listed below that are related to the content of your manuscript. "Related" means any relation with for-profit or not-for-profit third parties whose interests may be affected by the content of the manuscript. Disclosure represents a commitment to transparency and does not necessarily indicate a bias. If you are in doubt about whether to list a relationship/activity/interest, it is preferable that you do so.

The following questions apply to the author's relationships/activities/interests as they relate to the current manuscript only.

The author's relationships/activities/interests should be defined broadly. For example, if your manuscript pertains to the epidemiology of hypertension, you should declare all relationships with manufacturers of antihypertensive medication, even if that medication is not mentioned in the manuscript.

In item #1 below, report all support for the work reported in this manuscript without time limit. For all other items, the time frame for disclosure is the past 36 months.

|                                                           |                                                                                                                                                                                | Name all entities with whom you have this relationship or indicate none (add rows as needed)     | Specifications/Comments (e.g., if payments were made to you or to your institution) |
|-----------------------------------------------------------|--------------------------------------------------------------------------------------------------------------------------------------------------------------------------------|--------------------------------------------------------------------------------------------------|-------------------------------------------------------------------------------------|
| <b>Time frame: Since the initial planning of the work</b> |                                                                                                                                                                                |                                                                                                  |                                                                                     |
| 1                                                         | All support for the present manuscript (e.g., funding, provision of study materials, medical writing, article processing charges, etc.)<br><b>No time limit for this item.</b> | Technology support from Xiaoxing Su and Yan Lei of Berry Oncology Corporation for Bioinformatics |                                                                                     |
|                                                           |                                                                                                                                                                                |                                                                                                  |                                                                                     |
|                                                           |                                                                                                                                                                                |                                                                                                  |                                                                                     |
|                                                           |                                                                                                                                                                                |                                                                                                  |                                                                                     |
|                                                           |                                                                                                                                                                                |                                                                                                  |                                                                                     |
|                                                           |                                                                                                                                                                                |                                                                                                  |                                                                                     |
|                                                           |                                                                                                                                                                                |                                                                                                  |                                                                                     |
| <b>Time frame: past 36 months</b>                         |                                                                                                                                                                                |                                                                                                  |                                                                                     |
| 2                                                         | Grants or contracts from any entity (if not indicated in item #1 above).                                                                                                       | None                                                                                             |                                                                                     |
|                                                           |                                                                                                                                                                                |                                                                                                  |                                                                                     |
| 3                                                         | Royalties or licenses                                                                                                                                                          | None                                                                                             |                                                                                     |
|                                                           |                                                                                                                                                                                |                                                                                                  |                                                                                     |

|    |                                                                                                              |      |  |
|----|--------------------------------------------------------------------------------------------------------------|------|--|
| 4  | Consulting fees                                                                                              | None |  |
| 5  | Payment or honoraria for lectures, presentations, speakers bureaus, manuscript writing or educational events | None |  |
| 6  | Payment for expert testimony                                                                                 | None |  |
| 7  | Support for attending meetings and/or travel                                                                 | None |  |
| 8  | Patents planned, issued or pending                                                                           | None |  |
| 9  | Participation on a Data Safety Monitoring Board or Advisory Board                                            | None |  |
| 10 | Leadership or fiduciary role in other board, society, committee or advocacy group, paid or unpaid            | None |  |
| 11 | Stock or stock options                                                                                       | None |  |
| 12 | Receipt of equipment, materials, drugs, medical writing, gifts or other services                             | None |  |
| 13 | Other financial or non-financial interests                                                                   | None |  |

**Please summarize the above conflict of interest in the following box:**

The author received technology support from Xiaoxing Su and Yan Lei of Berry Oncology Corporation for Bioinformatics.

**Please place an "X" next to the following statement to indicate your agreement:**

**I certify that I have answered every question and have not altered the wording of any of the questions on this form.**

## ICMJE DISCLOSURE FORM

Date: 07.12.2021

Your Name: Petros Christopoulos

Manuscript Title: Good efficacy of alectinib in a case of advanced lung adenocarcinoma two rare ALK fusions: HIP1-ALK and LTBP1-ALK

Manuscript number (if known): \_\_\_\_\_

In the interest of transparency, we ask you to disclose all relationships/activities/interests listed below that are related to the content of your manuscript. "Related" means any relation with for-profit or not-for-profit third parties whose interests may be affected by the content of the manuscript. Disclosure represents a commitment to transparency and does not necessarily indicate a bias. If you are in doubt about whether to list a relationship/activity/interest, it is preferable that you do so.

The following questions apply to the author's relationships/activities/interests as they relate to the current manuscript only.

The author's relationships/activities/interests should be defined broadly. For example, if your manuscript pertains to the epidemiology of hypertension, you should declare all relationships with manufacturers of antihypertensive medication, even if that medication is not mentioned in the manuscript.

In item #1 below, report all support for the work reported in this manuscript without time limit. For all other items, the time frame for disclosure is the past 36 months.

|                                                           |                                                                                                                                                                                | Name all entities with whom you have this relationship or indicate none (add rows as needed)     | Specifications/Comments (e.g., if payments were made to you or to your institution)                                                      |
|-----------------------------------------------------------|--------------------------------------------------------------------------------------------------------------------------------------------------------------------------------|--------------------------------------------------------------------------------------------------|------------------------------------------------------------------------------------------------------------------------------------------|
| <b>Time frame: Since the initial planning of the work</b> |                                                                                                                                                                                |                                                                                                  |                                                                                                                                          |
| 1                                                         | All support for the present manuscript (e.g., funding, provision of study materials, medical writing, article processing charges, etc.)<br><b>No time limit for this item.</b> | Technology support from Xiaoxing Su and Yan Lei of Berry Oncology Corporation for Bioinformatics |                                                                                                                                          |
| <b>Time frame: past 36 months</b>                         |                                                                                                                                                                                |                                                                                                  |                                                                                                                                          |
| 2                                                         | Grants or contracts from any entity (if not indicated in item #1 above).                                                                                                       | Roche<br>Takeda<br>AstraZeneca<br>Novartis                                                       | research grant (to institution)<br>research grant (to institution)<br>research grant (to institution)<br>research grant (to institution) |
| 3                                                         | Royalties or licenses                                                                                                                                                          | <input checked="" type="checkbox"/> None                                                         |                                                                                                                                          |
| 4                                                         | Consulting fees                                                                                                                                                                | <input checked="" type="checkbox"/> None                                                         |                                                                                                                                          |

|    |                                                                                                              |                                          |                               |
|----|--------------------------------------------------------------------------------------------------------------|------------------------------------------|-------------------------------|
| 5  | Payment or honoraria for lectures, presentations, speakers bureaus, manuscript writing or educational events | Roche                                    | speaker's honoraria to myself |
|    |                                                                                                              | Takeda                                   | speaker's honoraria to myself |
|    |                                                                                                              | AstraZeneca                              | speaker's honoraria to myself |
|    |                                                                                                              | Novartis                                 | speaker's honoraria to myself |
| 6  | Payment for expert testimony                                                                                 | <input checked="" type="checkbox"/> None |                               |
|    |                                                                                                              |                                          |                               |
|    |                                                                                                              |                                          |                               |
| 7  | Support for attending meetings and/or travel                                                                 | AstraZeneca                              | to myself                     |
|    |                                                                                                              | Takeda                                   | to myself                     |
|    |                                                                                                              | Novartis                                 | to myself                     |
|    |                                                                                                              | Eli Lilly                                | to myself                     |
| 8  | Patents planned, issued or pending                                                                           | <input type="checkbox"/> None            |                               |
|    |                                                                                                              |                                          |                               |
|    |                                                                                                              |                                          |                               |
| 9  | Participation on a Data Safety Monitoring Board or Advisory Board                                            | Pfizer                                   | advisory board                |
|    |                                                                                                              | Chugai                                   | advisory board                |
|    |                                                                                                              | Boehringer Ingelheim                     | advisory board                |
|    |                                                                                                              | Roche                                    | advisory board                |
| 10 | Leadership or fiduciary role in other board, society, committee or advocacy group, paid or unpaid            | <input checked="" type="checkbox"/> None |                               |
|    |                                                                                                              |                                          |                               |
|    |                                                                                                              |                                          |                               |
| 11 | Stock or stock options                                                                                       | <input checked="" type="checkbox"/> None |                               |
|    |                                                                                                              |                                          |                               |
|    |                                                                                                              |                                          |                               |
| 12 | Receipt of equipment, materials, drugs, medical writing, gifts or other services                             | <input checked="" type="checkbox"/> None |                               |
|    |                                                                                                              |                                          |                               |
|    |                                                                                                              |                                          |                               |
| 13 | Other financial or non-financial interests                                                                   | <input checked="" type="checkbox"/> None |                               |
|    |                                                                                                              |                                          |                               |
|    |                                                                                                              |                                          |                               |

**Please summarize the above conflict of interest in the following box:**

Petros Christopoulos has received research funding from AstraZeneca, Novartis, Roche, and Takeda, speaker's honoraria from AstraZeneca, Novartis, Roche, Takeda, support for attending meetings from AstraZeneca, Eli Lilly, Novartis, Takeda, and personal fees for participating to advisory boards from Boehringer Ingelheim, Chugai, Pfizer and Roche, all outside the submitted work. We have received technology support from Xiaoxing Su and Yan Lei of Berry Oncology Corporation for Bioinformatics.

**Please place an "X" next to the following statement to indicate your agreement:**

I certify that I have answered every question and have not altered the wording of any of the questions on this form.

## ICMJE DISCLOSURE FORM

Date: 12/17/2021

Your Name: Marc G DENIS

Manuscript Title: Significant efficacy of alectinib on a patient with advanced lung adenocarcinoma with two rare ALK fusion site

Manuscript number (if known): TLCR-21-1039

In the interest of transparency, we ask you to disclose all relationships/activities/interests listed below that are related to the content of your manuscript. "Related" means any relation with for-profit or not-for-profit third parties whose interests may be affected by the content of the manuscript. Disclosure represents a commitment to transparency and does not necessarily indicate a bias. If you are in doubt about whether to list a relationship/activity/interest, it is preferable that you do so.

The following questions apply to the author's relationships/activities/interests as they relate to the current manuscript only.

The author's relationships/activities/interests should be defined broadly. For example, if your manuscript pertains to the epidemiology of hypertension, you should declare all relationships with manufacturers of antihypertensive medication, even if that medication is not mentioned in the manuscript.

In item #1 below, report all support for the work reported in this manuscript without time limit. For all other items, the time frame for disclosure is the past 36 months.

|                                                           |                                                                                                                                                                                | Name all entities with whom you have this relationship or indicate none (add rows as needed)      | Specifications/Comments (e.g., if payments were made to you or to your institution) |
|-----------------------------------------------------------|--------------------------------------------------------------------------------------------------------------------------------------------------------------------------------|---------------------------------------------------------------------------------------------------|-------------------------------------------------------------------------------------|
| <b>Time frame: Since the initial planning of the work</b> |                                                                                                                                                                                |                                                                                                   |                                                                                     |
| 1                                                         | All support for the present manuscript (e.g., funding, provision of study materials, medical writing, article processing charges, etc.)<br><b>No time limit for this item.</b> | Technology support from Xiaoxing Su and Yan Lei of Berry Oncology Corporation for Bioinformatics. |                                                                                     |
|                                                           |                                                                                                                                                                                |                                                                                                   |                                                                                     |
|                                                           |                                                                                                                                                                                |                                                                                                   |                                                                                     |
|                                                           |                                                                                                                                                                                |                                                                                                   |                                                                                     |
|                                                           |                                                                                                                                                                                |                                                                                                   |                                                                                     |
|                                                           |                                                                                                                                                                                |                                                                                                   |                                                                                     |
|                                                           |                                                                                                                                                                                |                                                                                                   |                                                                                     |
| <b>Time frame: past 36 months</b>                         |                                                                                                                                                                                |                                                                                                   |                                                                                     |
| 2                                                         | Grants or contracts from any entity (if not indicated in item #1 above).                                                                                                       | <input checked="" type="checkbox"/> None                                                          |                                                                                     |
|                                                           |                                                                                                                                                                                |                                                                                                   |                                                                                     |
| 3                                                         | Royalties or licenses                                                                                                                                                          | <input checked="" type="checkbox"/> None                                                          |                                                                                     |

|    |                                                                                                              |                                          |  |
|----|--------------------------------------------------------------------------------------------------------------|------------------------------------------|--|
|    |                                                                                                              |                                          |  |
| 4  | Consulting fees                                                                                              | <input checked="" type="checkbox"/> None |  |
| 5  | Payment or honoraria for lectures, presentations, speakers bureaus, manuscript writing or educational events | <input checked="" type="checkbox"/> None |  |
| 6  | Payment for expert testimony                                                                                 | <input checked="" type="checkbox"/> None |  |
| 7  | Support for attending meetings and/or travel                                                                 | <input checked="" type="checkbox"/> None |  |
| 8  | Patents planned, issued or pending                                                                           | <input checked="" type="checkbox"/> None |  |
| 9  | Participation on a Data Safety Monitoring Board or Advisory Board                                            | <input checked="" type="checkbox"/> None |  |
| 10 | Leadership or fiduciary role in other board, society, committee or advocacy group, paid or unpaid            | <input checked="" type="checkbox"/> None |  |
| 11 | Stock or stock options                                                                                       | <input checked="" type="checkbox"/> None |  |
| 12 | Receipt of equipment, materials, drugs, medical writing, gifts or other services                             | <input checked="" type="checkbox"/> None |  |
| 13 | Other financial or non-financial interests                                                                   | <input checked="" type="checkbox"/> None |  |

**Please summarize the above conflict of interest in the following box:**

The author received technology support from Xiaoxing Su and Yan Lei of Berry Oncology Corporation for Bioinformatics.

**Please place an "X" next to the following statement to indicate your agreement:**

**I certify that I have answered every question and have not altered the wording of any of the questions on this form.**

## ICMJE DISCLOSURE FORM

Date: 20.12.2021

Your Name: Qisen Guo

Manuscript Title: High efficacy of alectinib in a patient with advanced lung adenocarcinoma with 2 rare ALK fusion sites: a case report

Manuscript number (if known):       TLCR-21-1039      

In the interest of transparency, we ask you to disclose all relationships/activities/interests listed below that are related to the content of your manuscript. "Related" means any relation with for-profit or not-for-profit third parties whose interests may be affected by the content of the manuscript. Disclosure represents a commitment to transparency and does not necessarily indicate a bias. If you are in doubt about whether to list a relationship/activity/interest, it is preferable that you do so.

The following questions apply to the author's relationships/activities/interests as they relate to the current manuscript only.

The author's relationships/activities/interests should be defined broadly. For example, if your manuscript pertains to the epidemiology of hypertension, you should declare all relationships with manufacturers of antihypertensive medication, even if that medication is not mentioned in the manuscript.

In item #1 below, report all support for the work reported in this manuscript without time limit. For all other items, the time frame for disclosure is the past 36 months.

|                                                           |                                                                                                                                                                                | Name all entities with whom you have this relationship or indicate none (add rows as needed)      | Specifications/Comments (e.g., if payments were made to you or to your institution) |
|-----------------------------------------------------------|--------------------------------------------------------------------------------------------------------------------------------------------------------------------------------|---------------------------------------------------------------------------------------------------|-------------------------------------------------------------------------------------|
| <b>Time frame: Since the initial planning of the work</b> |                                                                                                                                                                                |                                                                                                   |                                                                                     |
| 1                                                         | All support for the present manuscript (e.g., funding, provision of study materials, medical writing, article processing charges, etc.)<br><b>No time limit for this item.</b> | Shandong Key Research and Development Program (No. 2019GSF108251)                                 |                                                                                     |
|                                                           |                                                                                                                                                                                | Technology support from Xiaoxing Su and Yan Lei of Berry Oncology Corporation for Bioinformatics. |                                                                                     |
| <b>Time frame: past 36 months</b>                         |                                                                                                                                                                                |                                                                                                   |                                                                                     |
| 2                                                         | Grants or contracts from any entity (if not indicated in item #1 above).                                                                                                       | <input type="checkbox"/> None                                                                     |                                                                                     |
|                                                           |                                                                                                                                                                                |                                                                                                   |                                                                                     |
| 3                                                         | Royalties or licenses                                                                                                                                                          | <input type="checkbox"/> None                                                                     |                                                                                     |
|                                                           |                                                                                                                                                                                |                                                                                                   |                                                                                     |
| 4                                                         | Consulting fees                                                                                                                                                                | <input type="checkbox"/> None                                                                     |                                                                                     |

|    |                                                                                                              |                                          |  |
|----|--------------------------------------------------------------------------------------------------------------|------------------------------------------|--|
|    |                                                                                                              |                                          |  |
| 5  | Payment or honoraria for lectures, presentations, speakers bureaus, manuscript writing or educational events | <input checked="" type="checkbox"/> None |  |
| 6  | Payment for expert testimony                                                                                 | <input checked="" type="checkbox"/> None |  |
| 7  | Support for attending meetings and/or travel                                                                 | <input checked="" type="checkbox"/> None |  |
| 8  | Patents planned, issued or pending                                                                           | <input checked="" type="checkbox"/> None |  |
| 9  | Participation on a Data Safety Monitoring Board or Advisory Board                                            | <input checked="" type="checkbox"/> None |  |
| 10 | Leadership or fiduciary role in other board, society, committee or advocacy group, paid or unpaid            | <input checked="" type="checkbox"/> None |  |
| 11 | Stock or stock options                                                                                       | <input checked="" type="checkbox"/> None |  |
| 12 | Receipt of equipment, materials, drugs, medical writing, gifts or other services                             | <input checked="" type="checkbox"/> None |  |
| 13 | Other financial or non-financial interests                                                                   | <input checked="" type="checkbox"/> None |  |

**Please summarize the above conflict of interest in the following box:**

Qisen Guo reports funding from the Shandong Key Research and Development Program (No. 2019GSF108251). We have received technology support from Xiaoxing Su and Yan Lei of Berry Oncology Corporation for Bioinformatics.

**Please place an "X" next to the following statement to indicate your agreement:**

**X I certify that I have answered every question and have not altered the wording of any of the questions on this form.**
