# Supplementary material for: High efficacy of alectinib in a patient with advanced lung adenocarcinoma with 2 rare ALK fusion sites: a case report
Source: PubMed Central journal article supplement — Transl Lung Cancer Res. 2022 Jan;11(1):100–10. doi: 10.21037/tlcr-21-1039 (PMC8825656; doi:10.21037/tlcr-21-1039), 2022-01
Supplement: tlcr-11-01-100-rc.pdf [file tlcr-11-01-100-rc.pdf]

| Topic                       | Item No | Checklist item description                                                                             | Reported on Page Number/Line Number | Reported on Section/Paragraph |
|-----------------------------|---------|--------------------------------------------------------------------------------------------------------|-------------------------------------|-------------------------------|
| Title                       | 1       | The diagnosis or intervention of primary focus followed by the words “case report”                     |                                     |                               |
| Key Words                   | 2       | 2 to 5 key words that identify diagnoses or interventions in this case report, including "case report" |                                     |                               |
| Abstract<br>(no references) | 3a      | Introduction: What is unique about this case and what does it add to the scientific literature?        |                                     |                               |
|                             | 3b      | Main symptoms and/or important clinical findings                                                       |                                     |                               |
|                             | 3c      | The main diagnoses, therapeutic interventions, and outcomes                                            |                                     |                               |
|                             | 3d      | Conclusion—What is the main “take-away” lesson(s) from this case?                                      |                                     |                               |
| Introduction                | 4       | One or two paragraphs summarizing why this case is unique ( <b>may include references</b> )            |                                     |                               |
| Patient Information         | 5a      | De-identified patient specific information                                                             |                                     |                               |
|                             | 5b      | Primary concerns and symptoms of the patient                                                           |                                     |                               |
|                             | 5c      | Medical, family, and psycho-social history including relevant genetic information                      |                                     |                               |
|                             | 5d      | Relevant past interventions with outcomes                                                              |                                     |                               |
| Clinical Findings           | 6       | Describe significant physical examination (PE) and important clinical findings                         |                                     |                               |
| Timeline                    | 7       | Historical and current information from this episode of care organized as a timeline                   |                                     |                               |
| Diagnostic Assessment       | 8a      | Diagnostic testing (such as PE, laboratory testing, imaging, surveys).                                 |                                     |                               |
|                             | 8b      | Diagnostic challenges (such as access to testing, financial, or cultural)                              |                                     |                               |
|                             | 8c      | Diagnosis (including other diagnoses considered)                                                       |                                     |                               |
|                             | 8d      | Prognosis (such as staging in oncology) where applicable                                               |                                     |                               |
| Therapeutic Intervention    | 9a      | Types of therapeutic intervention (such as pharmacologic, surgical, preventive, self-care)             |                                     |                               |
|                             | 9b      | Administration of therapeutic intervention (such as dosage, strength, duration)                        |                                     |                               |
|                             | 9c      | Changes in therapeutic intervention (with rationale)                                                   |                                     |                               |

|                        |     |                                                                                                        |                                         |                             |
|------------------------|-----|--------------------------------------------------------------------------------------------------------|-----------------------------------------|-----------------------------|
| Follow-up and Outcomes | 10a | Clinician and patient-assessed outcomes (if available)                                                 |                                         |                             |
|                        | 10b | Important follow-up diagnostic and other test results                                                  |                                         |                             |
|                        | 10c | Intervention adherence and tolerability (How was this assessed?)                                       |                                         |                             |
|                        | 10d | Adverse and unanticipated events                                                                       |                                         |                             |
| Discussion             | 11a | A scientific discussion of the strengths AND limitations associated with this case report              |                                         |                             |
|                        | 11b | Discussion of the relevant medical literature <b>with references</b>                                   |                                         |                             |
|                        | 11c | The scientific rationale for any conclusions (including assessment of possible causes)                 |                                         |                             |
|                        | 11d | The primary “take-away” lessons of this case report (without references) in a one paragraph conclusion |                                         |                             |
| Patient Perspective    | 12  | The patient should share their perspective in one to two paragraphs on the treatment(s) they received  |                                         |                             |
| Informed Consent       | 13  | Did the patient give informed consent? Please provide if requested                                     | Yes <input checked="" type="checkbox"/> | No <input type="checkbox"/> |
